# Supplementary material for: Electrochemical Sensor Based on Molecularly Imprinted Polymer for the Detection of Cefalexin
Source: PubMed Central journal article supplement (PMC6468396; doi:10.3390/bios9010031), 2019-02-27
Supplement: biosensors-09-00031-s001.pdf [file biosensors-09-00031-s001.pdf]

# Electrochemical sensor based on molecularly imprinted polymer for the detection of cefalexin

Bogdan Feier<sup>a#</sup>, Adrian Blidar<sup>a#</sup>, Alexandra Pusta<sup>a</sup>, Paula Carciuc<sup>a</sup>, Cecilia Cristea<sup>a\*</sup>

<sup>a</sup>Analytical Chemistry Department, Faculty of Pharmacy,

Iuliu Hațieganu University of Medicine and Pharmacy, 4 Pasteur St., 400349 Cluj-Napoca,

Romania

\*ccristea@umfcluj.ro;

Phone: +40264597256 (extension: 2840); Fax: +40264597257

# equal contribution

## Supplementary information

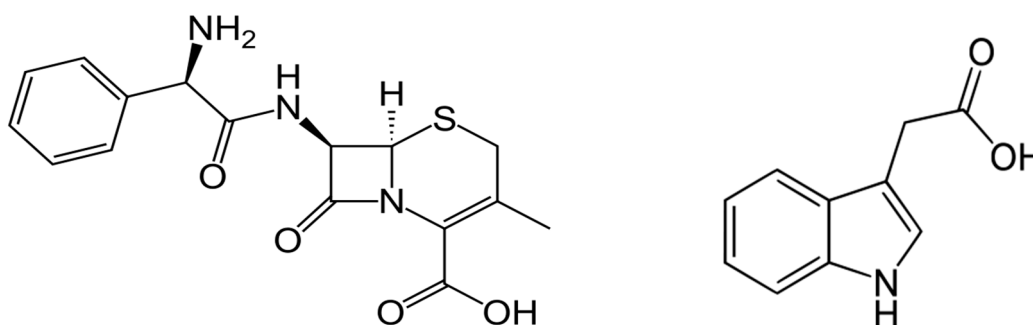

Figure S1. CFX (left) and I3AA (right) structures

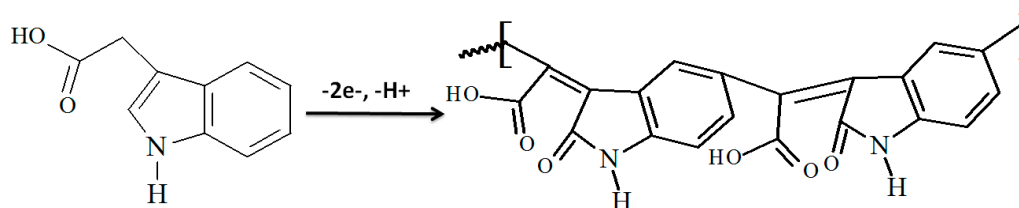

Figure S2. The polymerization mechanism

**Table S1.** Redox probe for the MIP-modified GCE

| <b>Polymerization: 1 mM I3AA, 0.5 mM CFX, 5 cycles; Extraction: NaOH 0.1 M, 30 min; Incubation: 0.5 <math>\mu</math>M CFX, water, 30 min</b> |                          |                         |                          |                          |                         |                          |
|----------------------------------------------------------------------------------------------------------------------------------------------|--------------------------|-------------------------|--------------------------|--------------------------|-------------------------|--------------------------|
| <b>Redox probe</b>                                                                                                                           | <b>GCE</b>               |                         |                          |                          |                         |                          |
|                                                                                                                                              | <b>MIP</b>               |                         |                          | <b>NIP</b>               |                         |                          |
|                                                                                                                                              | <b>S<sub>polym</sub></b> | <b>S<sub>extr</sub></b> | <b>S<sub>incub</sub></b> | <b>S<sub>polym</sub></b> | <b>S<sub>extr</sub></b> | <b>S<sub>incub</sub></b> |
| [Ru(NH <sub>3</sub> ) <sub>6</sub> ] <sup>3+</sup>                                                                                           | 0.885                    | 9.413                   | 0.027                    | 0.87                     | 8.725                   | 0.023                    |
| [Fe(CN) <sub>6</sub> ] <sup>3-/4-</sup>                                                                                                      | <b>0.995</b>             | <b>6.320</b>            | <b>0.436</b>             | <b>0.995</b>             | <b>1.138</b>            | <b>0.176</b>             |
| 1,1'-ferrocenedimethanol                                                                                                                     | 0.925                    | 12.235                  | 0.022                    | 0.916                    | 11.374                  | 0.021                    |

**Table S2.** Redox probe for the MIP-modified BDDE

| <b>Polymerization: 1 mM I3AA, 0.5 mM CFX, 5 cycles; Extraction: NaOH 0.1 M, 30 min; Incubation: 0.5 <math>\mu</math>M CFX, water, 30 min</b> |                          |                         |                          |                          |                         |                          |
|----------------------------------------------------------------------------------------------------------------------------------------------|--------------------------|-------------------------|--------------------------|--------------------------|-------------------------|--------------------------|
| <b>Redox probe</b>                                                                                                                           | <b>BDDE</b>              |                         |                          |                          |                         |                          |
|                                                                                                                                              | <b>MIP</b>               |                         |                          | <b>NIP</b>               |                         |                          |
|                                                                                                                                              | <b>S<sub>polym</sub></b> | <b>S<sub>extr</sub></b> | <b>S<sub>incub</sub></b> | <b>S<sub>polym</sub></b> | <b>S<sub>extr</sub></b> | <b>S<sub>incub</sub></b> |
| [Ru(NH <sub>3</sub> ) <sub>6</sub> ] <sup>3+</sup>                                                                                           | 0.835                    | 7.635                   | 0.015                    | 0.85                     | 7.881                   | 0.024                    |
| [Fe(CN) <sub>6</sub> ] <sup>3-/4-</sup>                                                                                                      | <b>0.986</b>             | <b>8.348</b>            | <b>0.532</b>             | <b>0.993</b>             | <b>0.735</b>            | <b>0.123</b>             |
| 1,1'-ferrocenedimethanol                                                                                                                     | 0.934                    | 12.483                  | 0.03                     | 0.945                    | 11.856                  | 0.018                    |

**Table S3.** Optimization of polymerization – DPV signal, on the GCE electrode

| <b>Extraction: NaOH 0.1 M, 30 min; Incubation: 0.5 <math>\mu</math>M CFX, water, 30 min</b> |              |                          |                         |                          |                          |                         |                          |
|---------------------------------------------------------------------------------------------|--------------|--------------------------|-------------------------|--------------------------|--------------------------|-------------------------|--------------------------|
| <b>Parameter</b>                                                                            | <b>Value</b> | <b>GCE</b>               |                         |                          |                          |                         |                          |
|                                                                                             |              | <b>MIP</b>               |                         |                          | <b>NIP</b>               |                         |                          |
|                                                                                             |              | <b>S<sub>polym</sub></b> | <b>S<sub>extr</sub></b> | <b>S<sub>incub</sub></b> | <b>S<sub>polym</sub></b> | <b>S<sub>extr</sub></b> | <b>S<sub>incub</sub></b> |
| <b>C<sub>mon</sub> (mM)</b><br>(C <sub>temp</sub> – 0.05 mM)                                | 0.1          | 0.907                    | 5.210                   | 0.311                    | 0.957                    | 2.425                   | 0.284                    |
|                                                                                             | <b>1</b>     | <b>0.932</b>             | <b>4.870</b>            | <b>0.358</b>             | <b>0.978</b>             | <b>2.310</b>            | <b>0.292</b>             |
|                                                                                             | 5            | 0.981                    | 3.920                   | 0.243                    | 0.99                     | 1.485                   | 0.287                    |
| <b>C<sub>temp</sub> (mM)</b><br>(C <sub>mon</sub> – 1 mM)                                   | 0.01         | 0.942                    | 3.460                   | 0.303                    | <b>0.978</b>             | <b>2.310</b>            | <b>0.292</b>             |
|                                                                                             | 0.05         | 0.932                    | 4.870                   | 0.358                    |                          |                         |                          |
|                                                                                             | 0.1          | 0.921                    | 6.650                   | 0.398                    |                          |                         |                          |
|                                                                                             | <b>0.5</b>   | <b>0.973</b>             | <b>8.820</b>            | <b>0.501</b>             |                          |                         |                          |
|                                                                                             | 1            | 0.872                    | 9.750                   | 0.373                    |                          |                         |                          |
| <b>No of cycles</b>                                                                         | 2            | 0.93                     | 7.240                   | 0.382                    | 0.963                    | 2.670                   | 0.294                    |
|                                                                                             | <b>5</b>     | <b>0.973</b>             | <b>8.820</b>            | <b>0.501</b>             | <b>0.978</b>             | <b>2.310</b>            | <b>0.292</b>             |
|                                                                                             | 10           | 0.987                    | 6.230                   | 0.238                    | 0.985                    | 1.860                   | 0.107                    |

**Table S4. Optimization of polymerization – DPV signal, on the BDDE electrode**

| Extraction: NaOH 0.1 M, 30 min; Incubation: 0.5 $\mu$ M CFX, water, 30 min |            |              |              |              |              |              |              |
|----------------------------------------------------------------------------|------------|--------------|--------------|--------------|--------------|--------------|--------------|
| Parameter                                                                  | Value      | BDDE         |              |              |              |              |              |
|                                                                            |            | MIP          |              |              | NIP          |              |              |
|                                                                            |            | $S_{polym}$  | $S_{extr}$   | $S_{incub}$  | $S_{polym}$  | $S_{extr}$   | $S_{incub}$  |
| $C_{mon}$ (mM)<br>( $C_{temp} - 0.05$ mM)                                  | 0.1        | 0.915        | 6.930        | 0.327        | 0.948        | 1.432        | 0.271        |
|                                                                            | <b>1</b>   | <b>0.927</b> | <b>6.340</b> | <b>0.398</b> | <b>0.965</b> | <b>1.235</b> | <b>0.257</b> |
|                                                                            | 5          | 0.972        | 5.280        | 0.289        | 0.987        | 0.845        | 0.238        |
| $C_{temp}$ (mM)<br>( $C_{mon} - 0.05$ mM)                                  | 0.01       | 0.958        | 5.670        | 0.297        | <b>0.965</b> | <b>1.235</b> | <b>0.257</b> |
|                                                                            | 0.05       | 0.927        | 6.340        | 0.398        |              |              |              |
|                                                                            | 0.1        | 0.949        | 7.860        | 0.475        |              |              |              |
|                                                                            | <b>0.5</b> | <b>0.987</b> | <b>9.530</b> | <b>0.604</b> |              |              |              |
|                                                                            | 1          | 0.898        | 10.230       | 0.412        |              |              |              |
| No of cycles                                                               | 2          | 0.953        | 7.830        | 0.432        | 0.924        | 1.023        | 0.246        |
|                                                                            | <b>5</b>   | <b>0.987</b> | <b>9.530</b> | <b>0.604</b> | <b>0.965</b> | <b>1.235</b> | <b>0.257</b> |
|                                                                            | 10         | 0.991        | 8.010        | 0.367        | 0.982        | 0.723        | 0.209        |

**Table S5. Optimization of polymerization – EIS signal, on the GCE electrode**

| Extraction: NaOH 0.1 M, 30 min; Incubation: 0.5 $\mu$ M CFX, water, 30 min |            |               |              |              |               |              |              |
|----------------------------------------------------------------------------|------------|---------------|--------------|--------------|---------------|--------------|--------------|
| Parameter                                                                  | Value      | GCE           |              |              |               |              |              |
|                                                                            |            | MIP           |              |              | NIP           |              |              |
|                                                                            |            | $S_{polym}$   | $S_{extr}$   | $S_{incub}$  | $S_{polym}$   | $S_{extr}$   | $S_{incub}$  |
| $C_{mon}$ (mM)<br>( $C_{temp} - 0.05$ mM)                                  | 0.1        | 10.763        | 0.839        | 0.467        | 22.267        | 0.708        | 0.397        |
|                                                                            | <b>1</b>   | <b>13.701</b> | <b>0.827</b> | <b>0.558</b> | <b>45.167</b> | <b>0.698</b> | <b>0.413</b> |
|                                                                            | 5          | 52.34         | 0.794        | 0.325        | 97.023        | 0.598        | 0.403        |
| $C_{temp}$ (mM)<br>( $C_{mon} - 0.05$ mM)                                  | 0.01       | 16.241        | 0.774        | 0.434        | <b>45.167</b> | <b>0.698</b> | <b>0.413</b> |
|                                                                            | 0.05       | 13.701        | 0.827        | 0.558        |               |              |              |
|                                                                            | 0.1        | 11.94         | 0.867        | 0.672        |               |              |              |
|                                                                            | <b>0.5</b> | <b>39.034</b> | <b>0.901</b> | <b>1.011</b> |               |              |              |
|                                                                            | 1          | 9.835         | 0.908        | 0.597        |               |              |              |
| No of cycles                                                               | 2          | 14.015        | 0.879        | 0.619        | 26.027        | 0.723        | 0.416        |
|                                                                            | <b>5</b>   | <b>39.034</b> | <b>0.901</b> | <b>1.011</b> | <b>45.167</b> | <b>0.698</b> | <b>0.413</b> |
|                                                                            | 10         | 79.678        | 0.863        | 0.315        | 66.687        | 0.651        | 0.121        |

**Table S6. Optimization of polymerization – EIS signal, on the BDDE electrode**

| Extraction: NaOH 0.1 M, 30 min; Incubation: 0.5 $\mu$ M CFX, water, 30 min |            |               |              |              |               |              |              |
|----------------------------------------------------------------------------|------------|---------------|--------------|--------------|---------------|--------------|--------------|
| Parameter                                                                  | Value      | BDDE          |              |              |               |              |              |
|                                                                            |            | MIP           |              |              | NIP           |              |              |
|                                                                            |            | $S_{polym}$   | $S_{extr}$   | $S_{incub}$  | $S_{polym}$   | $S_{extr}$   | $S_{incub}$  |
| $C_{mon}$ (mM)<br>( $C_{temp} - 0.05$ mM)                                  | 0.1        | 10.775        | 0.874        | 0.487        | 18.345        | 0.589        | 0.372        |
|                                                                            | <b>1</b>   | <b>12.743</b> | <b>0.865</b> | <b>0.662</b> | <b>28.572</b> | <b>0.563</b> | <b>0.347</b> |
|                                                                            | 5          | 34.716        | 0.842        | 0.407        | 75.94         | 0.46         | 0.314        |
| $C_{temp}$ (mM)<br>( $C_{mon} - 0.05$ mM)                                  | 0.01       | 22.812        | 0.85         | 0.423        | <b>28.572</b> | <b>0.563</b> | <b>0.347</b> |
|                                                                            | 0.05       | 12.743        | 0.865        | 0.662        |               |              |              |
|                                                                            | 0.1        | 18.609        | 0.888        | 0.905        |               |              |              |
|                                                                            | <b>0.5</b> | <b>76.345</b> | <b>0.907</b> | <b>1.525</b> |               |              |              |
|                                                                            | 1          | 8.813         | 0.911        | 0.7          |               |              |              |
| No of cycles                                                               | 2          | 21.276        | 0.893        | 0.763        | 12.346        | 0.508        | 0.329        |
|                                                                            | <b>5</b>   | <b>76.345</b> | <b>0.907</b> | <b>1.525</b> | <b>28.572</b> | <b>0.563</b> | <b>0.347</b> |
|                                                                            | 10         | 102.123       | 0.891        | 0.583        | 55.321        | 0.421        | 0.267        |

**Table S5. Optimization of extraction – DPV signal**

| Polymerization: 1 mM I3AA, 0.5 mM CFX, 5 cycles; Extraction: NaOH 0.1 M, 30 min; Redox probes: 10 mM Fe <sup>3+</sup> – DPV, 10 mM [Fe(CN) <sub>6</sub> ] <sup>-3/-4</sup> -EIS |                |                   |                    |                   |                    |                   |                    |                   |                    |
|---------------------------------------------------------------------------------------------------------------------------------------------------------------------------------|----------------|-------------------|--------------------|-------------------|--------------------|-------------------|--------------------|-------------------|--------------------|
| Solvent                                                                                                                                                                         | Time (minutes) | GCE               |                    |                   |                    | BDDE              |                    |                   |                    |
|                                                                                                                                                                                 |                | MIP               |                    | NIP               |                    | MIP               |                    | NIP               |                    |
|                                                                                                                                                                                 |                | S <sub>extr</sub> | S <sub>incub</sub> | S <sub>extr</sub> | S <sub>incub</sub> | S <sub>extr</sub> | S <sub>incub</sub> | S <sub>extr</sub> | S <sub>incub</sub> |
| MeOH                                                                                                                                                                            | 5              | 6.410             | 0.352              | 1.813             | 0.284              | 7.762             | 0.415              | 1.627             | 0.203              |
|                                                                                                                                                                                 | 15             | 7.560             | 0.391              | 2.840             | 0.312              | 8.853             | 0.521              | 2.154             | 0.225              |
|                                                                                                                                                                                 | 30             | 9.750             | 0.448              | 3.152             | 0.287              | 10.236            | 0.557              | 3.231             | 0.248              |
|                                                                                                                                                                                 | 60             | 11.380            | 0.37               | 3.750             | 0.279              | 12.053            | 0.456              | 3.689             | 0.235              |
| NaOH<br>0.1M                                                                                                                                                                    | 5              | 4.510             | 0.345              | 1.423             | 0.289              | 5.387             | 0.423              | 0.926             | 0.25               |
|                                                                                                                                                                                 | 15             | 6.330             | 0.404              | 1.873             | 0.29               | 7.325             | 0.527              | 1.085             | 0.253              |
|                                                                                                                                                                                 | <b>30</b>      | <b>8.820</b>      | <b>0.501</b>       | <b>2.310</b>      | <b>0.292</b>       | <b>9.530</b>      | <b>0.604</b>       | <b>1.235</b>      | <b>0.257</b>       |
|                                                                                                                                                                                 | 60             | 9.280             | 0.435              | 2.458             | 0.283              | 9.864             | 0.461              | 1.367             | 0.239              |
| PBS, pH<br>7.4                                                                                                                                                                  | 5              | 2.320             | 0.345              | 0.856             | 0.285              | 3.213             | 0.423              | 0.763             | 0.244              |
|                                                                                                                                                                                 | 15             | 4.530             | 0.404              | 1.341             | 0.283              | 4.345             | 0.525              | 0.959             | 0.248              |
|                                                                                                                                                                                 | 30             | 6.210             | 0.467              | 1.557             | 0.278              | 5.847             | 0.585              | 1.183             | 0.245              |
|                                                                                                                                                                                 | 60             | 6.850             | 0.374              | 1.625             | 0.277              | 6.329             | 0.46               | 1.348             | 0.247              |

**Table S6. Optimization of extraction – EIS signal**

| Polymerization: 1 mM I3AA, 0.5 mM CFX, 5 cycles; Extraction: NaOH 0.1 M, 30 min; Redox probe: 10 mM [Fe(CN) <sub>6</sub> ] <sup>-3/-4</sup> |                |                   |                    |                    |                   |                    |                    |                   |                    |
|---------------------------------------------------------------------------------------------------------------------------------------------|----------------|-------------------|--------------------|--------------------|-------------------|--------------------|--------------------|-------------------|--------------------|
| Solvent                                                                                                                                     | Time (minutes) | GCE               |                    |                    |                   | BDDE               |                    |                   |                    |
|                                                                                                                                             |                | MIP               |                    | NIP                |                   | MIP                |                    | NIP               |                    |
|                                                                                                                                             |                | S <sub>extr</sub> | S <sub>incub</sub> | S <sub>polym</sub> | S <sub>extr</sub> | S <sub>polym</sub> | S <sub>polym</sub> | S <sub>extr</sub> | S <sub>polym</sub> |
| MeOH                                                                                                                                        | 5              | 0.866             | 0.544              | 0.644              | 0.398             | 0.886              | 0.709              | 0.624             | 0.252              |
|                                                                                                                                             | 15             | 0.885             | 0.647              | 0.741              | 0.456             | 0.899              | 1.091              | 0.683             | 0.29               |
|                                                                                                                                             | 30             | 0.908             | 0.81               | 0.759              | 0.404             | 0.911              | 1.257              | 0.764             | 0.331              |
|                                                                                                                                             | 60             | 0.92              | 0.588              | 0.792              | 0.387             | 0.925              | 0.839              | 0.787             | 0.306              |
| NaOH 0.1M                                                                                                                                   | 5              | 0.818             | 0.527              | 0.587              | 0.407             | 0.843              | 0.732              | 0.481             | 0.333              |
|                                                                                                                                             | 15             | 0.863             | 0.679              | 0.653              | 0.409             | 0.881              | 1.114              | 0.52              | 0.337              |
|                                                                                                                                             | 30             | <b>0.899</b>      | <b>1.011</b>       | <b>0.697</b>       | <b>0.414</b>      | <b>0.905</b>       | <b>1.525</b>       | <b>0.553</b>      | <b>0.348</b>       |
|                                                                                                                                             | 60             | 0.903             | 0.771              | 0.71               | 0.395             | 0.908              | 0.854              | 0.577             | 0.314              |
| PBS, pH 7.4                                                                                                                                 | 5              | 0.696             | 0.527              | 0.461              | 0.399             | 0.763              | 0.732              | 0.433             | 0.323              |
|                                                                                                                                             | 15             | 0.821             | 0.677              | 0.572              | 0.395             | 0.813              | 1.104              | 0.489             | 0.331              |
|                                                                                                                                             | 30             | 0.863             | 0.876              | 0.609              | 0.385             | 0.854              | 1.408              | 0.542             | 0.321              |
|                                                                                                                                             | 60             | 0.873             | 0.597              | 0.619              | 0.384             | 0.867              | 0.849              | 0.574             | 0.328              |

**Table S7. Optimization of incubation (DPV, EIS)**

| Polymerization: 1 mM I3AA, 0.5 mM CFX, 5 cycles; Extraction: NaOH 0.1 M, 30 min; Redox probes: 10 mM Fe <sup>3+</sup> – DPV, 10 mM [Fe(CN) <sub>6</sub> ] <sup>-3/-4</sup> - EIS |                |              |              |              |              |              |              |              |              |
|----------------------------------------------------------------------------------------------------------------------------------------------------------------------------------|----------------|--------------|--------------|--------------|--------------|--------------|--------------|--------------|--------------|
| Solvent                                                                                                                                                                          | Time (minutes) | GCE          |              |              |              | BDDE         |              |              |              |
|                                                                                                                                                                                  |                | MIP          |              | NIP          |              | MIP          |              | NIP          |              |
|                                                                                                                                                                                  |                | DPV          | EIS          | DPV          | EIS          | DPV          | EIS          | DPV          | EIS          |
| Water                                                                                                                                                                            | 5              | 0.369        | 0.601        | 0.205        | 0.253        | 0.435        | 0.772        | 0.179        | 0.221        |
|                                                                                                                                                                                  | 15             | 0.430        | 0.777        | 0.237        | 0.306        | 0.546        | 1.203        | 0.213        | 0.268        |
|                                                                                                                                                                                  | 30             | <b>0.501</b> | <b>1.020</b> | <b>0.292</b> | <b>0.412</b> | <b>0.604</b> | <b>1.560</b> | <b>0.257</b> | <b>0.347</b> |
|                                                                                                                                                                                  | 60             | 0.505        | 1.023        | 0.298        | 0.420        | 0.609        | 1.540        | 0.261        | 0.351        |
| PBS, pH 7.4                                                                                                                                                                      | 5              | 0.372        | 0.610        | 0.204        | 0.261        | 0.440        | 0.792        | 0.205        | 0.258        |
|                                                                                                                                                                                  | 15             | 0.435        | 0.792        | 0.276        | 0.381        | 0.553        | 1.237        | 0.231        | 0.300        |
|                                                                                                                                                                                  | 30             | 0.506        | 1.035        | 0.293        | 0.414        | 0.612        | 1.567        | 0.262        | 0.352        |
|                                                                                                                                                                                  | 60             | 0.508        | 1.041        | 0.301        | 0.433        | 0.615        | 1.624        | 0.265        | 0.357        |

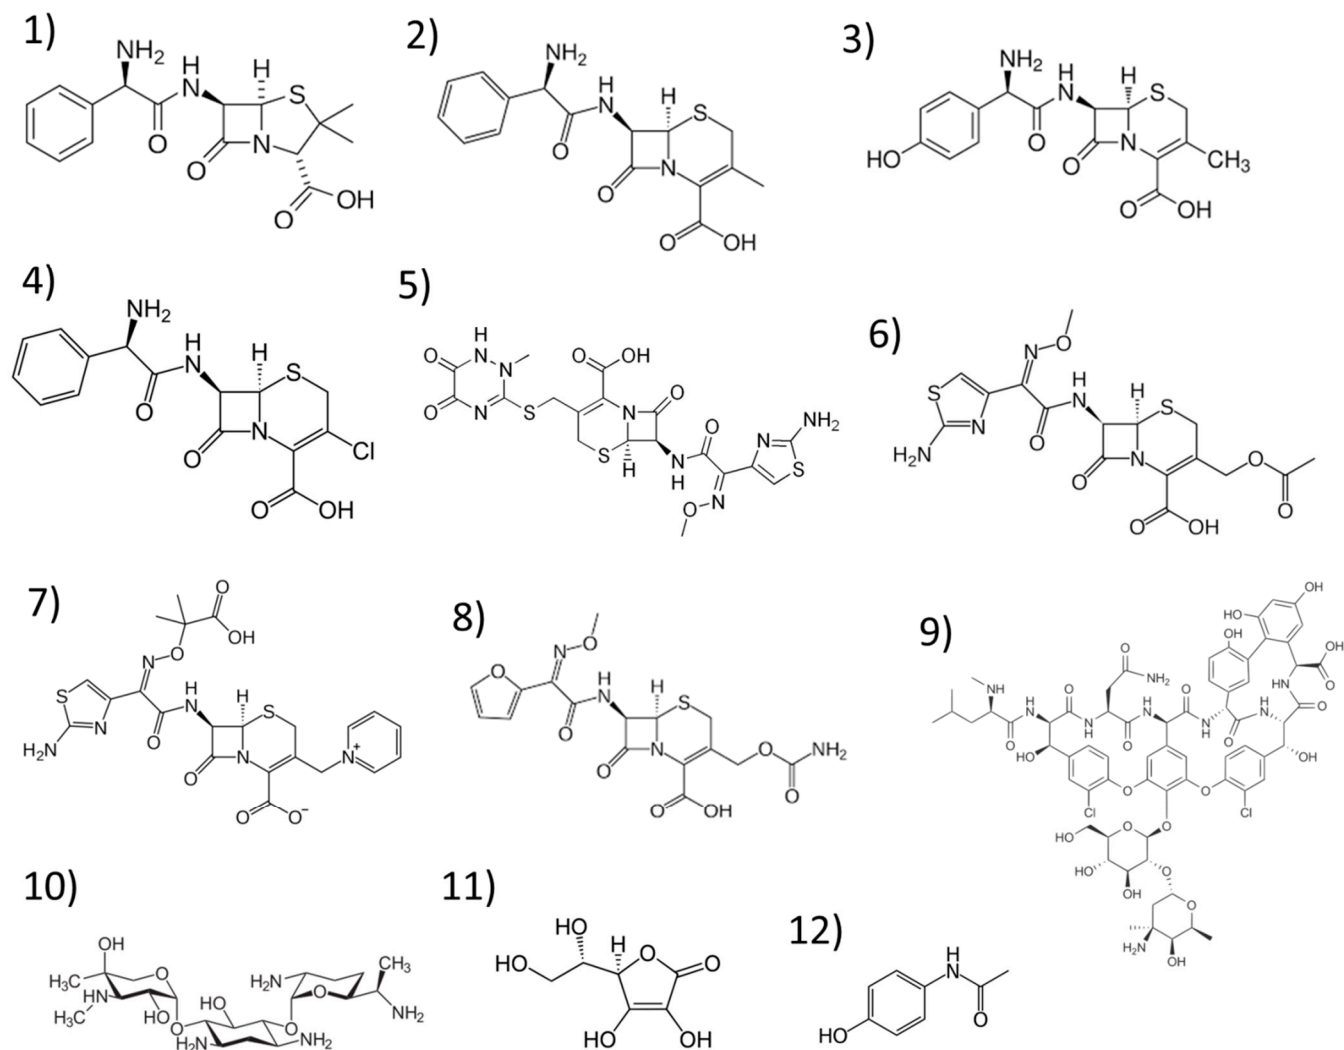

**Figure S3.** The structures of the molecules for which the MIP sensor was tested: 1) Ampicillin (AMP), 2) Cefalexin (CFX), 3) Cefadroxil (CFD), 4) Cefaclor (CFC), 5) Ceftriaxone (CFTXO), 6) Cefotaxime (CFTX), 7) Ceftazidime (CFTZ), 8) Cefuroxime (CFOX), 9) Vancomycin (VAN), (10) Gentamicin (GEN), 11) Ascorbic acid (AA) and 12) Acetaminophen (APAP)

**Table S8.** Comparative analytical performance of different methods for CFX detection

| No. | Method of detection                   | Linear range (ng/mL) | LOD (ng/mL) | Interferences                                                                                                                                                                                                                                                                                                                                                                                                                                          | Real-life samples                      | Observations                                                                                                                                                                       | Ref. |
|-----|---------------------------------------|----------------------|-------------|--------------------------------------------------------------------------------------------------------------------------------------------------------------------------------------------------------------------------------------------------------------------------------------------------------------------------------------------------------------------------------------------------------------------------------------------------------|----------------------------------------|------------------------------------------------------------------------------------------------------------------------------------------------------------------------------------|------|
| 1.  | Visualized microarray                 | 8.20–68.60           | 8.20        | Melamine, aflatoxin                                                                                                                                                                                                                                                                                                                                                                                                                                    | Milk                                   | Complex work protocol<br>Requires use of monoclonal antibodies (expensive, liable)                                                                                                 | (1)  |
| 2.  | MIP for SPE+ HPLC                     |                      |             | Ceftazidime, ampicillin and tetracycline hydrochloride                                                                                                                                                                                                                                                                                                                                                                                                 | Milk                                   | Complex work protocol<br>Requires qualified staff<br>Interferences on C18 SPE column due to non-specific interactions                                                              | (2)  |
| 3.  | MISPE-UHPLC–MS/MS                     |                      | 2.24        | Cefthiofur, cefazolin, cefquinome, cephapirin, cephalexin and cephalonium fluoroquinolones, doxycycline                                                                                                                                                                                                                                                                                                                                                | Milk                                   | Toxic reagents (ACN, MeOH)<br>Complex work protocol<br>Requires qualified staff<br>Low recovery rates for cephalexine<br>Similar recovery rates between analytes and interferences | (3)  |
| 4.  | Spectrophotometric UV                 | 800.00–2800.00       | 168.00      | Starch, lactose, glucose, sucrose, and gum acacia                                                                                                                                                                                                                                                                                                                                                                                                      | Pharm. form.                           | Requires derivatisation of the probe with 1,2-naftoquinone-4-sulphonic                                                                                                             | (4)  |
| 5.  | DPV on bare BDDE                      | 173.80-243313.00     | 34.74       | acetaminophen, ascorbic acid, glucose, other cephalosporins                                                                                                                                                                                                                                                                                                                                                                                            | River water, pharm. form., human urine | DPV peak for cephalexin decreases in the presence of other cephalosporins                                                                                                          | (5)  |
| 6.  | SWV on heated glassy carbon electrode | 208.55-17379.50      | 52.00       | Na <sup>+</sup> , K <sup>+</sup> , Ca <sup>2+</sup> , Cu <sup>2+</sup> , Mg <sup>2+</sup> , Cu <sup>2+</sup> , Pb <sup>2+</sup> , Zn <sup>2+</sup> , CO <sub>3</sub> <sup>2-</sup> , SO <sub>4</sub> <sup>2-</sup> , NO <sub>3</sub> <sup>-</sup> , Cl <sup>-</sup> , dextrin, amylum glucose, 100 NH <sub>4</sub> <sup>+</sup> , Fe <sup>2+</sup> , SO <sub>3</sub> <sup>2-</sup> , lactose, glucose and sucrose, and citric acid, urea and uric acid | Pharm. form.                           | Requires alkaline hydrolysis of the analyte before the method can be applied                                                                                                       | (6)  |

|     |                                                                                   |                    |                           |                                                                                                                                                                                                                                                                                 |                              |                                                                                                                                       |           |
|-----|-----------------------------------------------------------------------------------|--------------------|---------------------------|---------------------------------------------------------------------------------------------------------------------------------------------------------------------------------------------------------------------------------------------------------------------------------|------------------------------|---------------------------------------------------------------------------------------------------------------------------------------|-----------|
| 7.  | HPLC with UV detection                                                            | 25.00 to 1600.00   | 10.00                     | -                                                                                                                                                                                                                                                                               | Bovine milk                  | Harmful reagents (acetonitrile, glutaraldehyde)<br>Requires a protein exclusion step, using two columns and a column switching system | (7)       |
| 8.  | LC-ESI-MS/MS                                                                      | 2.00-100.00        | 0.50                      | Simultaneous detection with Cefminox, cefotaxime, cefetametplvoxll, ceftazidime, cephalonium cefixime cefadroxil, cefazolin, cefuroxime, cefalotin, cefradine, cefapirin cefaclor cefonicid, cefamandole, cefepime, ceftriaxone, cefpirome, cefoperazone, ceftiofur, cefquinome | Pork muscle                  | Harmful reagents<br>Qualified staff                                                                                                   | (8)       |
| 9.  | Microbiological system                                                            | -                  | 128.00                    | -                                                                                                                                                                                                                                                                               | Ovine milk                   | Lacks selectivity<br>Requires Geobacillus stearothermophilus spores, which can contaminate the work environment                       | (9)       |
| 10. | Electrochemical oxidation by CV using the boron-doped diamond thin-film electrode | In the range of mM | -                         | -                                                                                                                                                                                                                                                                               | -                            | Requires microwave plasma-assisted chemical vapor deposition of film<br>Deposition lasts about 10 h                                   | (10)      |
| 11  | Our MIP-based sensor                                                              | 3.47 - 347.38      | 1.11 (BDDE)<br>1.70 (GCE) | Cefadroxil, cefaclor, ceftriaxone, cefotaxime, ceftazidime, cefuroxime, ampicillin, gentamicin, vancomycin, ascorbic acid, acetaminophen                                                                                                                                        | Pharm. form.,<br>river water | -                                                                                                                                     | This work |

*Pharm. form - pharmaceutical formulations; LOD -Limit of detection*

## References

- Li Z, Li Z, Jiang J, Xu D. Simultaneous detection of various contaminants in milk based on visualized microarray. Food Control [Internet]. Elsevier; 2017 Mar 1 [cited 2018 Nov 1];73:994-1001. Available from:



<https://www.sciencedirect.com/science/article/pii/S0956713516305539>

2. Lata K, Sharma R, Naik L, Rajput YS, Mann B. Synthesis and application of cephalixin imprinted polymer for solid phase extraction in milk. *Food Chem* [Internet]. Elsevier; 2015 Oct 1 [cited 2018 Nov 1];184:176–82. Available from: <https://www.sciencedirect.com/science/article/pii/S0308814615004732>
3. Baeza AN, Urraca JL, Chamorro R, Orellana G, Castellari M, Moreno-Bondi MC. Multiresidue analysis of cephalosporin antibiotics in bovine milk based on molecularly imprinted polymer extraction followed by liquid chromatography-tandem mass spectrometry. *J Chromatogr A* [Internet]. Elsevier; 2016 Nov 25 [cited 2018 Nov 1];1474:121–9. Available from: <https://www.sciencedirect.com/science/article/pii/S0021967316314546>
4. Ali Ahmed SM, Elbashir AA, Aboul-Enein HY. New spectrophotometric method for determination of cephalosporins in pharmaceutical formulations. *Arab J Chem* [Internet]. Elsevier; 2015 Mar 1 [cited 2018 Nov 1];8(2):233–9. Available from: <https://www.sciencedirect.com/science/article/pii/S1878535211002255>
5. Feier B, Gui A, Cristea C, Săndulescu R. Electrochemical determination of cephalosporins using a bare boron-doped diamond electrode. *Anal Chim Acta* [Internet]. Elsevier; 2017 Jul 11 [cited 2018 Nov 1];976:25–34. Available from: <https://www.sciencedirect.com/science/article/pii/S0003267017305597>
6. Chen Y, Huang L, Lin Q. Rapid hydrolysis and electrochemical detection of cephalixin at a heated glassy carbon electrode. *Int J Electrochem Sci*. 2012;7(9):7948–59.
7. Oliveira R V., De Pietro AC, Cass QB. Quantification of cephalixin as residue levels in bovine milk by high-performance liquid chromatography with on-line sample cleanup. *Talanta* [Internet]. Elsevier; 2007 Feb 28 [cited 2018 Nov 1];71(3):1233–8. Available from: <https://www.sciencedirect.com/science/article/pii/S0039914006004589>
8. Li W, Shen H, Hong Y, Zhang Y, Yuan F, Zhang F. Simultaneous determination of 22 cephalosporins drug residues in pork muscle using liquid chromatography–tandem mass spectrometry. *J Chromatogr B* [Internet]. Elsevier; 2016 Jun 1 [cited 2018 Nov 1];1022:298–307. Available from: <https://www.sciencedirect.com/science/article/pii/S1570023216302458>
9. Nagel OG, Beltrán MC, Molina MP, Althaus RL. Novel microbiological system for antibiotic detection in ovine milk. *Small Rumin Res* [Internet]. Elsevier; 2012 Jan 1 [cited 2018 Nov 1];102(1):26–31. Available from: <https://www.sciencedirect.com/science/article/pii/S0921448811004573>
10. Chailapakul O, Aksharanandana P, Frelink T, Einaga Y, Fujishima A. The electrooxidation of sulfur-containing compounds at boron-doped diamond electrode. *Sensors Actuators B Chem* [Internet]. Elsevier; 2001 Dec 1 [cited 2018 Nov 1];80(3):193–201. Available from: <https://www.sciencedirect.com/science/article/pii/S0925400501009121>
